# Supplementary material
Source: publisher figshare collection journal article supplement (https://sage.figshare.com/ndownloader/files/17360120)
Supplement: Supplementary file 1 [file 17360120]

### **Expert Judgment Questionnaire Template**

Dear judge: You have been selected to evaluate the instrument and brief cognitive test, known as the ROWLAND UNIVERSAL DEMENTIA ASSESSMENT SCALE (RUDAS) that is a part of the doctoral thesis research investigation entitled “VALIDATION OF THE ROWLAND UNIVERSAL DEMENTIA ASSESSMENT SCALE (RUDAS) TO DETECT MILD COGNITIVE IMPAIRMENT AND DEMENTIA IN EARLY STAGES IN AN URBAN ILLITERATE POPULATION OF LIMA”. The evaluation of instruments is of great importance to achieve their validation and that the results obtained, aside from these, are used efficiently; contributing both to the research component of cognitive neurology as to its clinical applications.

We are grateful for your valuable collaboration.

FIRST NAME AND LAST NAME:

---

ACADEMIC BACKGROUND:

---

PROFESSIONAL EXPERIENCE:

---

TIME:\_\_\_\_\_

POSITION :\_\_\_\_\_

---

INSTITUTION:\_\_\_\_\_

Research investigation objective:

Determine the validity of the RUDAS in the detection of mild cognitive impairment and dementia in urban illiterate persons of Callao.

Objective of the expert judgment questionnaire:

Evaluate the cultural adaptation through an adequate conceptualization and operationalization of the RUDAS construct.

Objetive of the RUDAS test:

To establish the level of cognition in order to discriminate between cognitive healthy urban illiterate patients from those with mild cognitive dementia impairment and dementia.

Rate each of the following items (memory, visuo-spatial orientation, praxis, visuo-spatial construct, judgment and language) according to the following indicators.

| CATEGORY           | GRADE                         | INDICATOR                                                                                                |
|--------------------|-------------------------------|----------------------------------------------------------------------------------------------------------|
| <b>SUFFICIENCY</b> | 1. Does not meet the criteria | The items are not sufficient to measure the dimension.                                                   |
|                    | 2. Low level                  | The items measure some aspect of the dimension but do not correspond with the total dimension.           |
|                    | 3. Moderate level             | It is necessary to increase the number of items in order to evaluate the dimension completely.           |
|                    | 4. High level                 | The items are sufficient.                                                                                |
| <b>CLARITY</b>     | 1. Does not meet the criteria | The item is not clear.                                                                                   |
|                    | 2. Low level                  | The item requires several modifications or a major modification in the word usage, based on its meaning. |
|                    | 3. Moderate level             | A very specific modification is required of some of the terms of the item.                               |
|                    | 4. High level                 | The item is clear and has adequate semantics and syntax.                                                 |
| <b>COHERENCY</b>   | 1. Does not meet the criteria | The item does not have a logical relationship with the dimension.                                        |
|                    | 2. Low level                  | The item has a tangential relationship with the dimension.                                               |
|                    | 3. Moderate level             | The item has a moderate relationship with the dimension.                                                 |
|                    | 4. High level                 | The item has a complete relationship with the dimension.                                                 |
| <b>RELEVANCE</b>   | 1. Does not meet the criteria | The item may be eliminated without any effects on the measurement of the dimension.                      |
|                    | 2. Low level                  | The item has some relevance, but another item may be including what this one is measuring.               |
|                    | 3. Moderate level             | The item is relatively important.                                                                        |
|                    | 4. High level                 | The item is very relevant and must be included.                                                          |

Dear Judge: place a score (1, 2, 3 or 4) in each category and please feel free to note any observations for each dimension of the RUDAS

| DIMENSION                            | ITEM                                                                | SUFFICIENCY | COHERENCE | RELEVANCE | CLARITY | OBSERVATIONS |
|--------------------------------------|---------------------------------------------------------------------|-------------|-----------|-----------|---------|--------------|
| <b>Memory<br/>(Registered)</b>       | Coffee                                                              |             |           |           |         |              |
|                                      | Oil                                                                 |             |           |           |         |              |
|                                      | Eggs                                                                |             |           |           |         |              |
|                                      | Soap                                                                |             |           |           |         |              |
| <b>Orientation<br/>visuo-spatial</b> | Teach or indicate parts of the body                                 |             |           |           |         |              |
| <b>Praxis</b>                        | Alternating hand posture                                            |             |           |           |         |              |
| <b>Construct<br/>visuo-spatial</b>   | Copy of the cube drawing                                            |             |           |           |         |              |
| <b>Judgment</b>                      | Hypothetical situation of crossing the street with a lot of traffic |             |           |           |         |              |
| <b>Memory<br/>(Recall)</b>           | Remember the list of things (cofee, oil, eggs and soap)             |             |           |           |         |              |
| <b>Language</b>                      | Fluency in the animal category                                      |             |           |           |         |              |

Dear judge, do you belive another dimension exists that forms part of the construct and is not being evaluated? \_\_\_\_\_

Which

one? \_\_\_\_\_  
\_\_\_\_\_

Date:

Signature:
